# Supplementary material for: Regional, Layer, and Cell-Type-Specific Connectivity of the Mouse Default Mode Network
Source: PubMed Central journal article supplement — Neuron. 2021 Feb 3;109(3):545–559.e8. doi: 10.1016/j.neuron.2020.11.011 (PMC8150331; doi:10.1016/j.neuron.2020.11.011), 2021-02-03
Supplement: mmc1.pdf [file mmc1.pdf]

## Supplemental information

### Regional, Layer, and Cell-Type-Specific

#### Connectivity of the Mouse Default Mode Network

**Jennifer D. Whitesell, Adam Liska, Ludovico Coletta, Karla E. Hirokawa, Phillip Bohn, Ali Williford, Peter A. Groblewski, Nile Graddis, Leonard Kuan, Joseph E. Knox, Anh Ho, Wayne Wakeman, Philip R. Nicovich, Thuc Nghi Nguyen, Cindy T.J. van Velthoven, Emma Garren, Olivia Fong, Maitham Naeemi, Alex M. Henry, Nick Dee, Kimberly A. Smith, Boaz Levi, David Feng, Lydia Ng, Bosiljka Tasic, Hongkui Zeng, Stefan Mihalas, Alessandro Gozzi, and Julie A. Harris**

**A** Component 2: Somatomotor Cortex

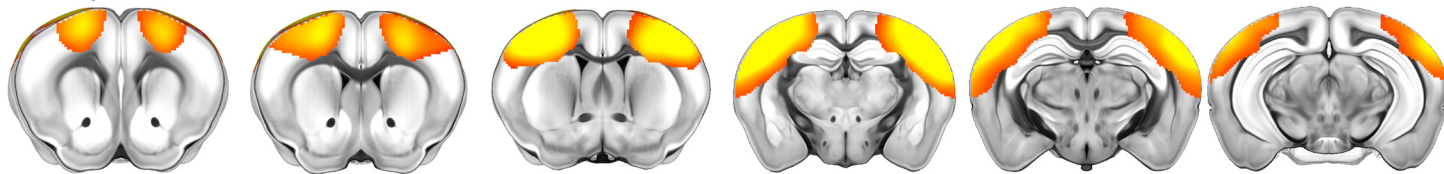

**B** Component 3: Latero-cortical Network

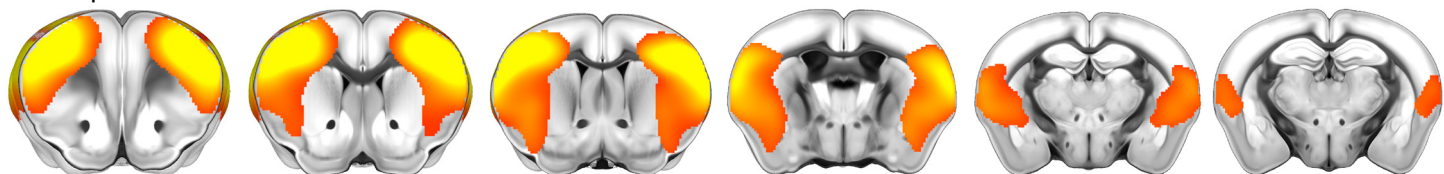

**C** Component 4: Hippocampal Network

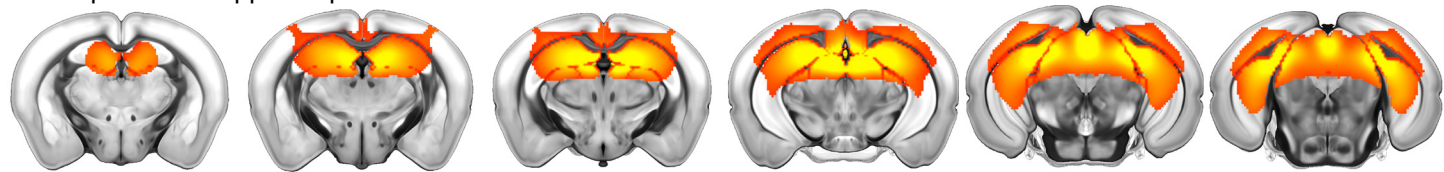

**D**

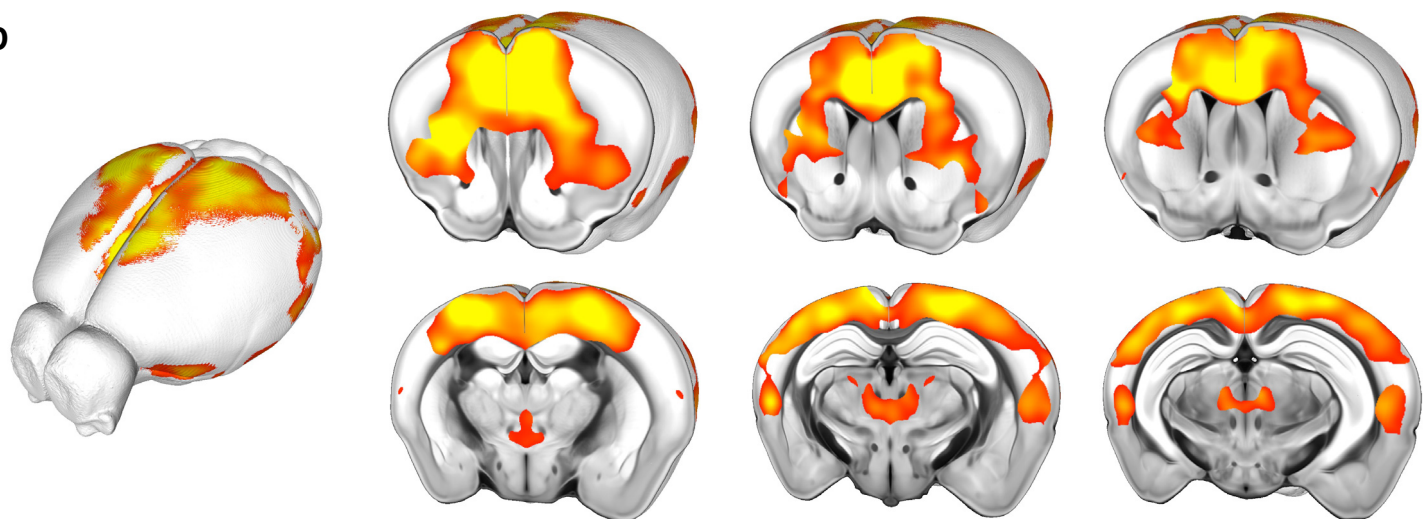

**E** Component 2  
Somatomotor Cortex

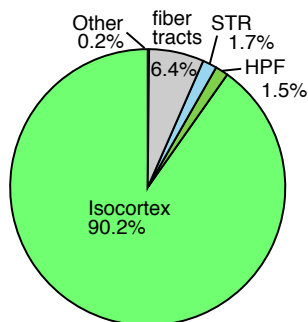

**F** Component 3  
Latero-Cortical Network

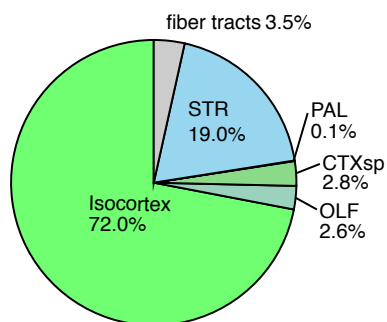

**G** Component 4  
Hippocampal Network

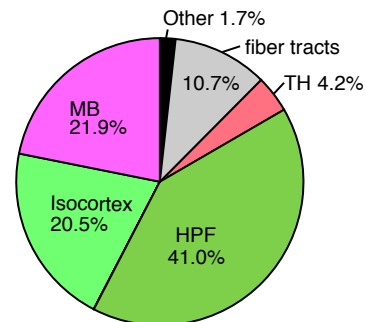

**Figure S1 related to Figure 1. Overlap of functional networks with major brain divisions**

(A-C) Additional components identified with independent component analysis (ICA) on resting state fMRI data. (D) An alternative DMN component generated with a seed pixel in ACA resembles the ICA map in **Figure 1B,C**. (E-G) Pie charts showing the composition of each component in terms of major brain divisions. Abbreviations: TH: thalamus, MB: midbrain, OLF: olfactory areas, CTXsp: cortical subplate, HPF: hippocampal formation, STR: striatum, PAL: pallidum.

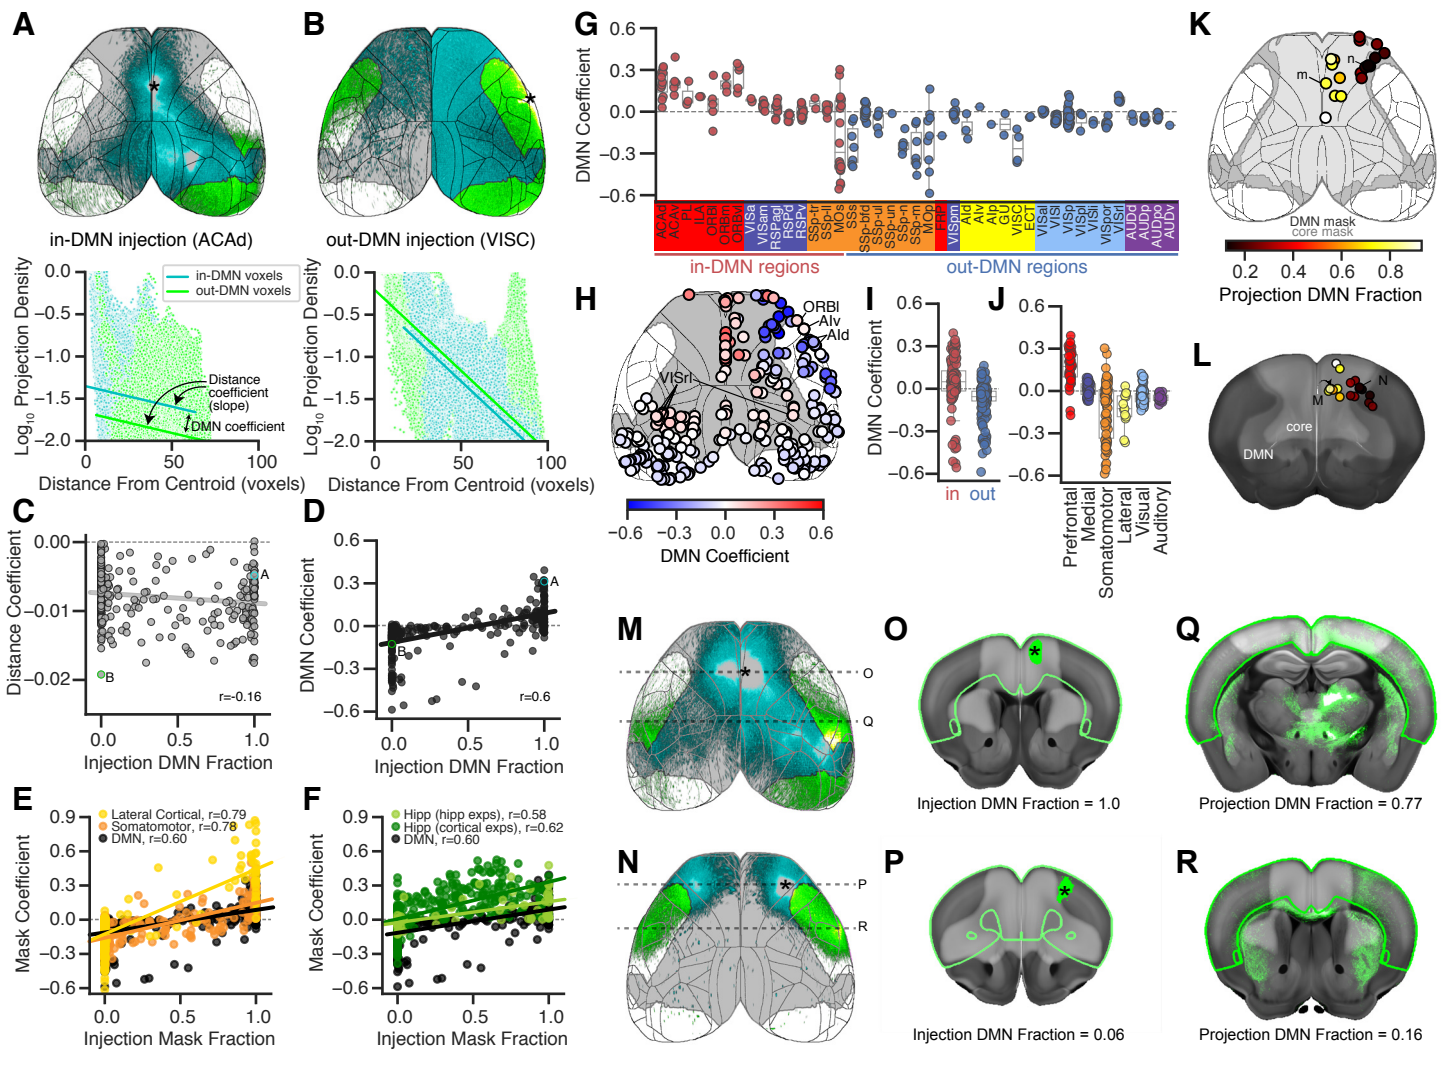

**Figure S2 related to Figure 2. Preferential DMN connectivity independent of distance and region boundaries**

(A,B) Cortical projections (top) and projection density per isocortex voxel (bottom) plotted for in-DMN voxels (cyan) and out-DMN voxels (green) in one in-DMN (A) and one out-DMN (B) experiment. Lines on bottom plots show the model fit for in-DMN voxels (cyan) and out-DMN voxels (green). The magnitude and sign of the DMN coefficient is reflected in the distance between the in-DMN and out-DMN fit lines, and the magnitude of the distance coefficient by the slope of the lines. Experiment IDs: 125833030 (A), 180436360 (B). (C) Distance coefficient and (D) DMN coefficient for each of the 300 injection experiments in WT, Emx1-Cre, and Rbp4-Cre mice from the MCA.  $r$  = Pearson correlation. Experiments shown in A and B are labeled on the graphs in C and D (green and cyan borders). (E,F) Coefficients for the projections of the same 300 experiments in the lateral cortical and somatomotor masks (E) and hippocampal mask (F) as a function of the fraction of the injection inside the ICA mask for that network. The plot for the DMN coefficient from D is replicated for reference. The coefficient for 53 hippocampal experiments from the MCA is also shown for the hippocampal mask (F, light green). (G) DMN coefficients for each of the 300 WT, Emx1, and Rbp4 experiments grouped by source structure. (H) Top down cortical projection map showing the location of these experiments colored by their DMN coefficient. (I,J) The same points shown in G grouped by in-DMN and out-DMN regions (I) and module (J). (K) Cortical surface map showing the location of the 18 injection experiments in secondary motor cortex (MOs) in WT, Emx1-Cre, and Rbp4-Cre mice from the MCA, colored by the fraction of cortical projections inside the DMN mask for each experiment. The boundary of the DMN and core masks are shown in gray and cortical structure boundaries in black. (L) Coronal view of the experiments in K overlaid on a maximum intensity projection of the corresponding portion of the average template brain, colored as in K. DMN and core masks are shown in gray, experiments shown in M and N are labeled. (M,N) Cortical projection images showing two example MOs injections. Asterisks indicate the approximate injection centroid. In-DMN projections are pseudocolored cyan and out-DMN projections green. Experiment IDs: 141603190 (C), 585025284 (D). Dashed lines show the rostral-caudal position of panels O-R. (O,P) Section through the center of the injection site showing segmented injection pixels (green) overlaid on the corresponding virtual coronal section from the CCFv3 template. (Q,R) Section at the approximate rostral-caudal position with the highest projection density showing segmented projection pixels (green) overlaid on the corresponding CCFv3 virtual template section. (O-R) DMN masks shown in light gray.

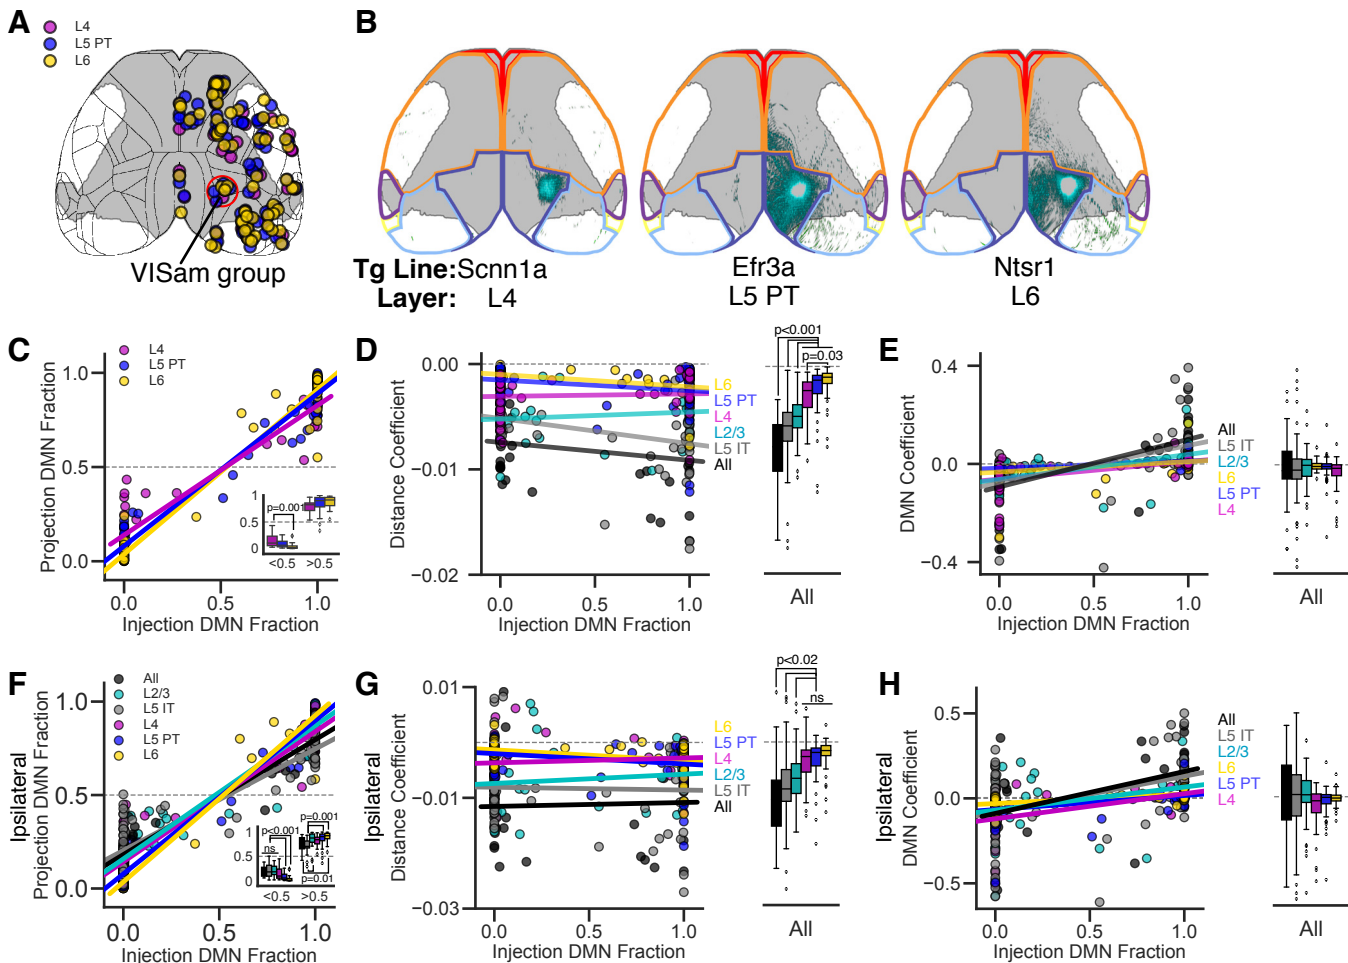

**Figure S3 related to Figure 3. L4, L6, and L5 PT neurons have mainly local projections.**

(A) Location of matched injection experiments in L4 selective Cre lines (magenta,  $n=43$ ), L5 PT selective Cre lines (blue,  $n=83$ ), and L6 selective Cre driver lines (yellow,  $n=61$ ), see Methods. Red circle indicates the injection centroids belonging to the anteromedial visual cortex (VISam) group; examples shown in B. The boundary of the DMN is shown in gray and cortical structure boundaries in black. (B) Cortical projections of experiments from the VISam group in a Scnn1a mouse line selective for L4 neurons (*left*), an Efr3a mouse line selective for L5 PT neurons (*center*), and an Ntsr1 mouse line selective for L6 neurons (*right*). Experiment IDs: Scnn1a 268038969, Efr3a 309515141, Ntsr1 156671933. (C) Scatterplot and linear fit for the fraction of cortical projections inside the DMN as a function of the fraction of the injection inside the DMN for each of the 187 cortical injections shown in A. Inset shows the projection DMN fraction for injections binned by the fraction of the injection polygon inside the DMN mask. (D) Distance coefficient, and (E) DMN coefficient plotted as a function of injection DMN fraction for the set of layer-selective experiments shown in Figure 3A and panel A. Boxplots show the same points binned by the fraction of injection polygon inside the DMN mask. (F) The fraction of ipsilateral projections inside the DMN as a function of the fraction of the injection inside the DMN. Inset shows the fraction of DMN projections for injections binned by the fraction of the injection polygon inside the DMN mask. The relative values for the different layer selective Cre lines are not different from the fraction of ipsilateral and contralateral projections inside the DMN (compare with C and **Figure 3C**). (G) The relationship between the ipsilateral distance coefficient and the fraction of an injection that is inside the DMN. The relative order of the Cre lines is the same as for ipsilateral and contralateral projections (D). (H) The relationship between the DMN coefficient for ipsilateral projections and the fraction of an injection experiment that is inside the DMN. The relative order of the Cre lines is the same as for ipsilateral and contralateral projections (E).

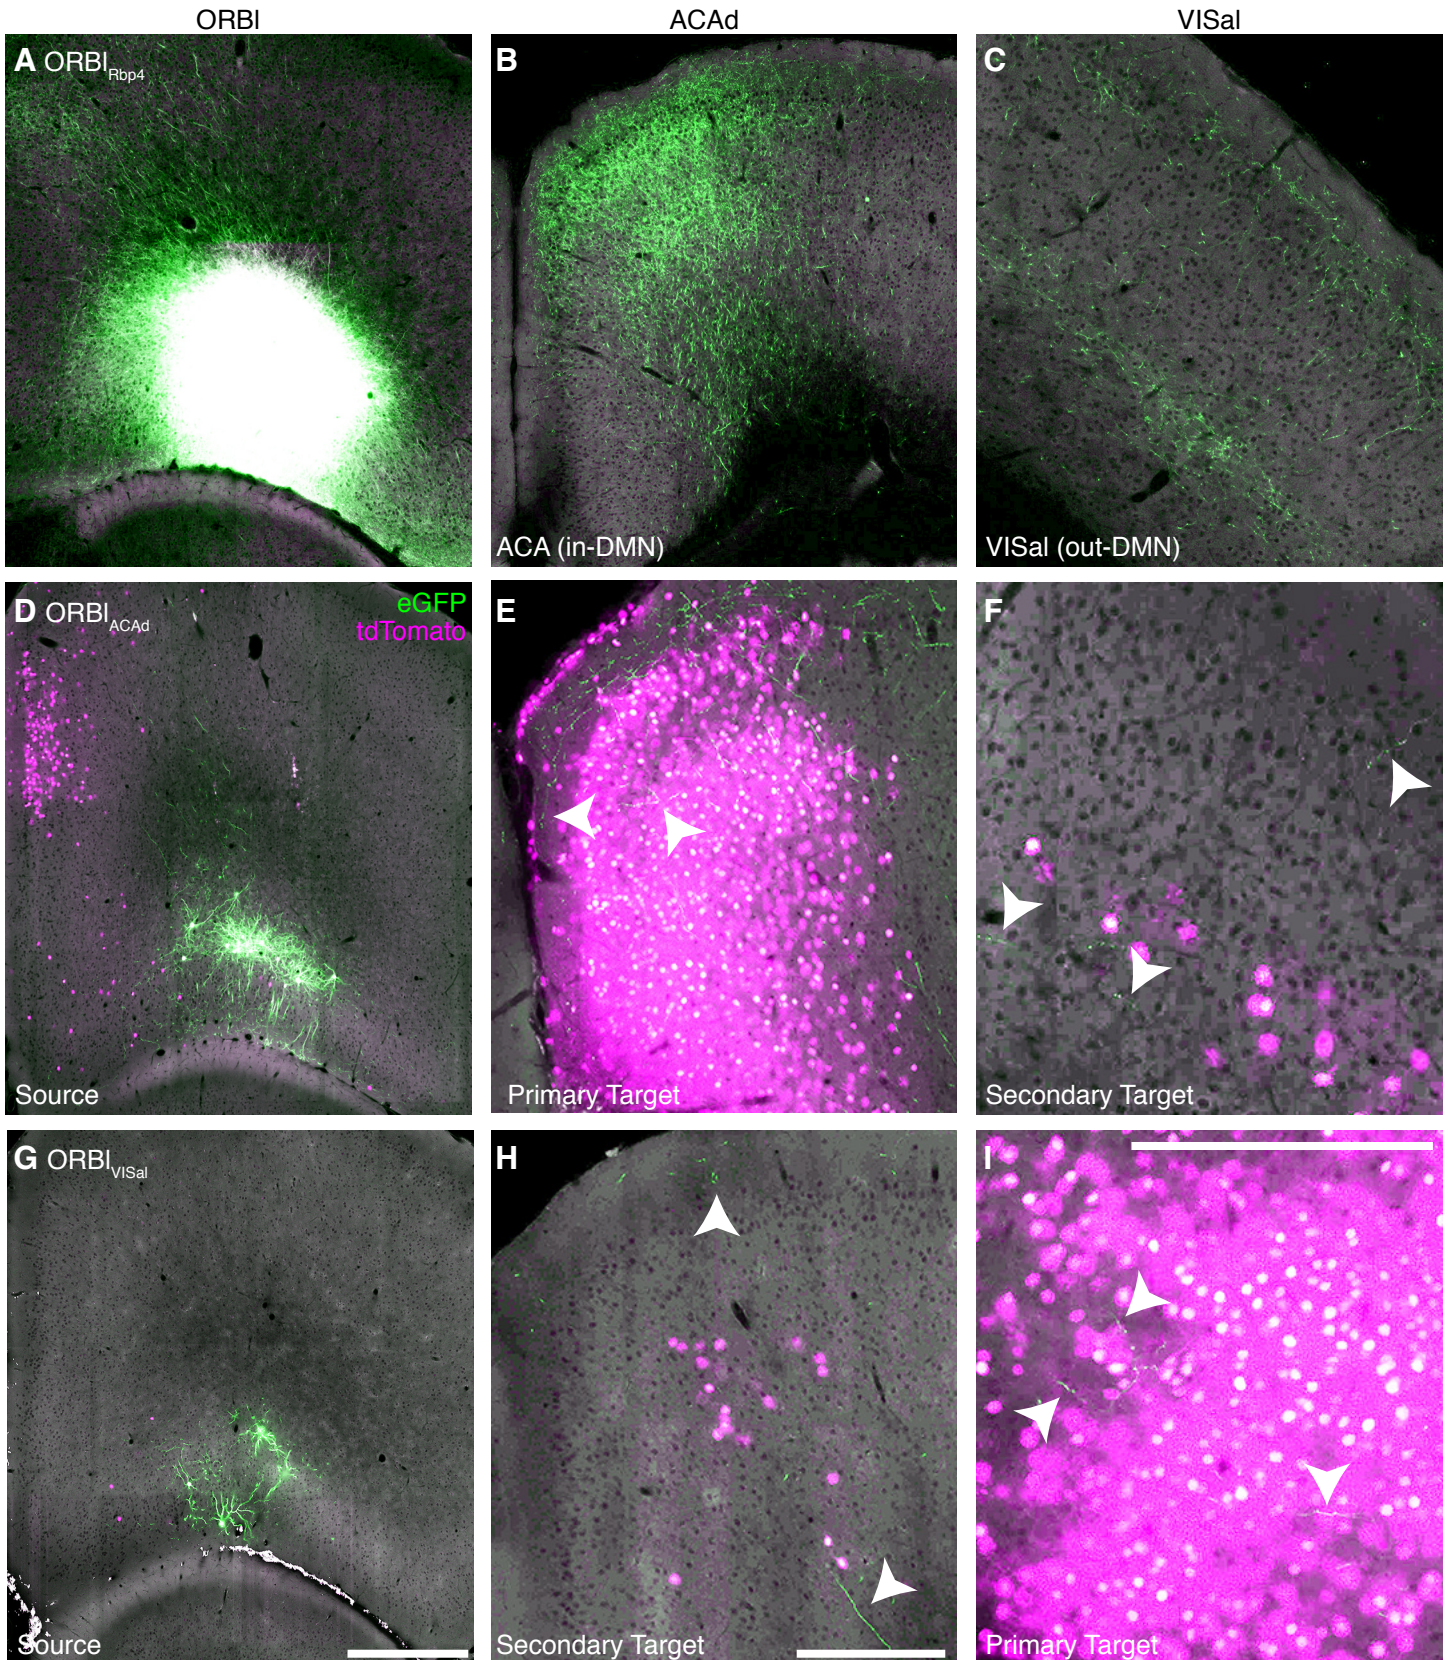

**Figure S4 related to Figure 4. High magnification images of target-defined tracer experiments**

(A) An ORBI injection in an *Rbp4*-Cre mouse. The injection site is saturated in this image so axons can be resolved. Projections from this experiment are visible in ACAAd (B) and VISal (C). (D) An ORBI<sub>ACAAd</sub> source injection (in-DMN target) showing cells coinfecting with both viruses (green), and nuclei from cells infected with only CAV2-Cre (magenta). Projections from the ORBI<sub>ACAAd</sub> cells are shown inside the CAV2-Cre injection site (E, primary target) and in VISal (F, secondary target). (G) An ORBI<sub>VISal</sub> source injection (out-DMN target). Projections from ORBI<sub>VISal</sub> cells are shown in ACAAd (H, secondary target) and VISal (I, primary target). Experiment IDs: ORBI<sub>Rbp4</sub> 156741826, ORBI<sub>ACAAd</sub> 571816813, ORBI<sub>VISal</sub> 601804603. All sections are coronal. Arrowheads point to axons. Scale=500  $\mu$ m, identical for vertically-aligned images.

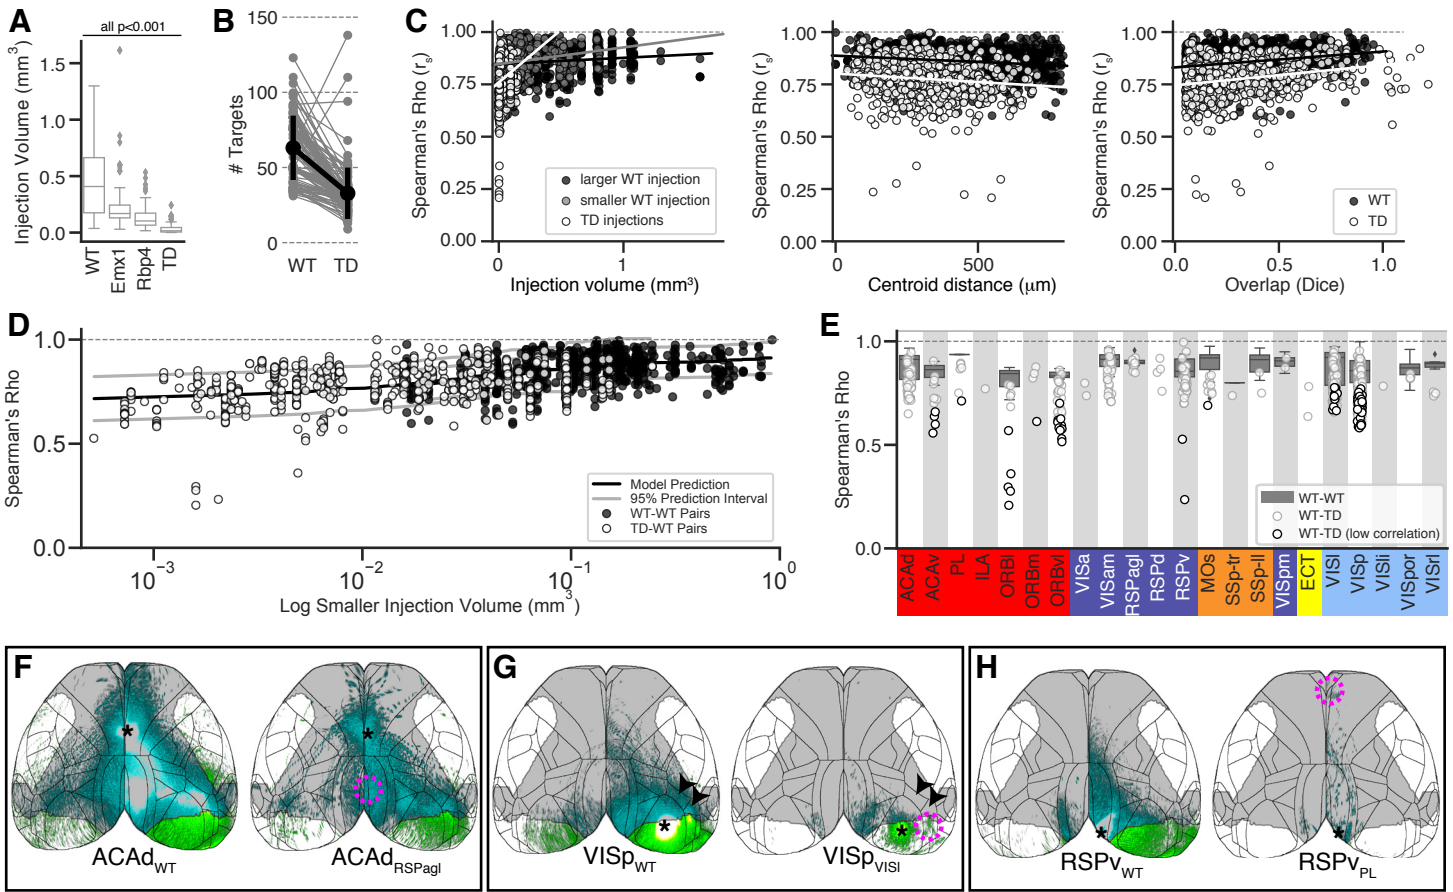

**Figure S5 related to Figure 5. Quantitative characterization of target-defined experiments**

(A) Injection volumes in TD experiments are significantly smaller than injection volumes in WT, Emx1-Cre, and Rbp4-Cre experiments. (B) Number of brain-wide targets with labeled axons (thresholded at log-transformed normalized projection volume  $> 10^{-1.5}$ ) in TD compared to their matched WT experiments. Thick black line: mean and standard deviation. (C) Injection volume (left), distance between injection centroids (center), and Dice overlap (right) for WT-WT experiment pairs (black and gray) and TD experiments (white). (D) Predicted (black line) and actual (points) Spearman correlation for each WT-WT (black), and WT-TD (white) injection-matched pair plotted as a function of the volume of the smaller injection in each pair. Gray lines show the 95% prediction interval. (E) Spearman's Rho ( $r_s$ ) for WT – WT injection matched pairs (gray boxplots) and WT – TD injection matched pairs (white points) plotted by source. Black borders indicate “low corr” pairs ( $r_s$  below the 95% prediction interval). (F-H) Cortical projection images of matched WT (left) and TD (right) experiments with injections in ACAd (F, not low corr), VISp (G, low corr), and RSPv (H, low corr). Asterisks indicate the approximate centroid of each AAV source injection. Dashed magenta circles indicate the approximate area of the CAV2-Cre target injection. Experiment IDs: ACAd<sub>WT</sub> 146593590, ACAd<sub>RSPagl</sub> 607059419, VISp<sub>WT</sub> 100141219, VISp<sub>VISI</sub> 515920693, RSPv<sub>WT</sub> 112595376, RSPv<sub>PL</sub> 623838656. Arrowheads in the center panel show projections in VISrl and VISal in the WT experiment that are absent in the TD experiment. Additional examples of TD experiments with ACAd and VISp source injections are presented in **Figure S6**.

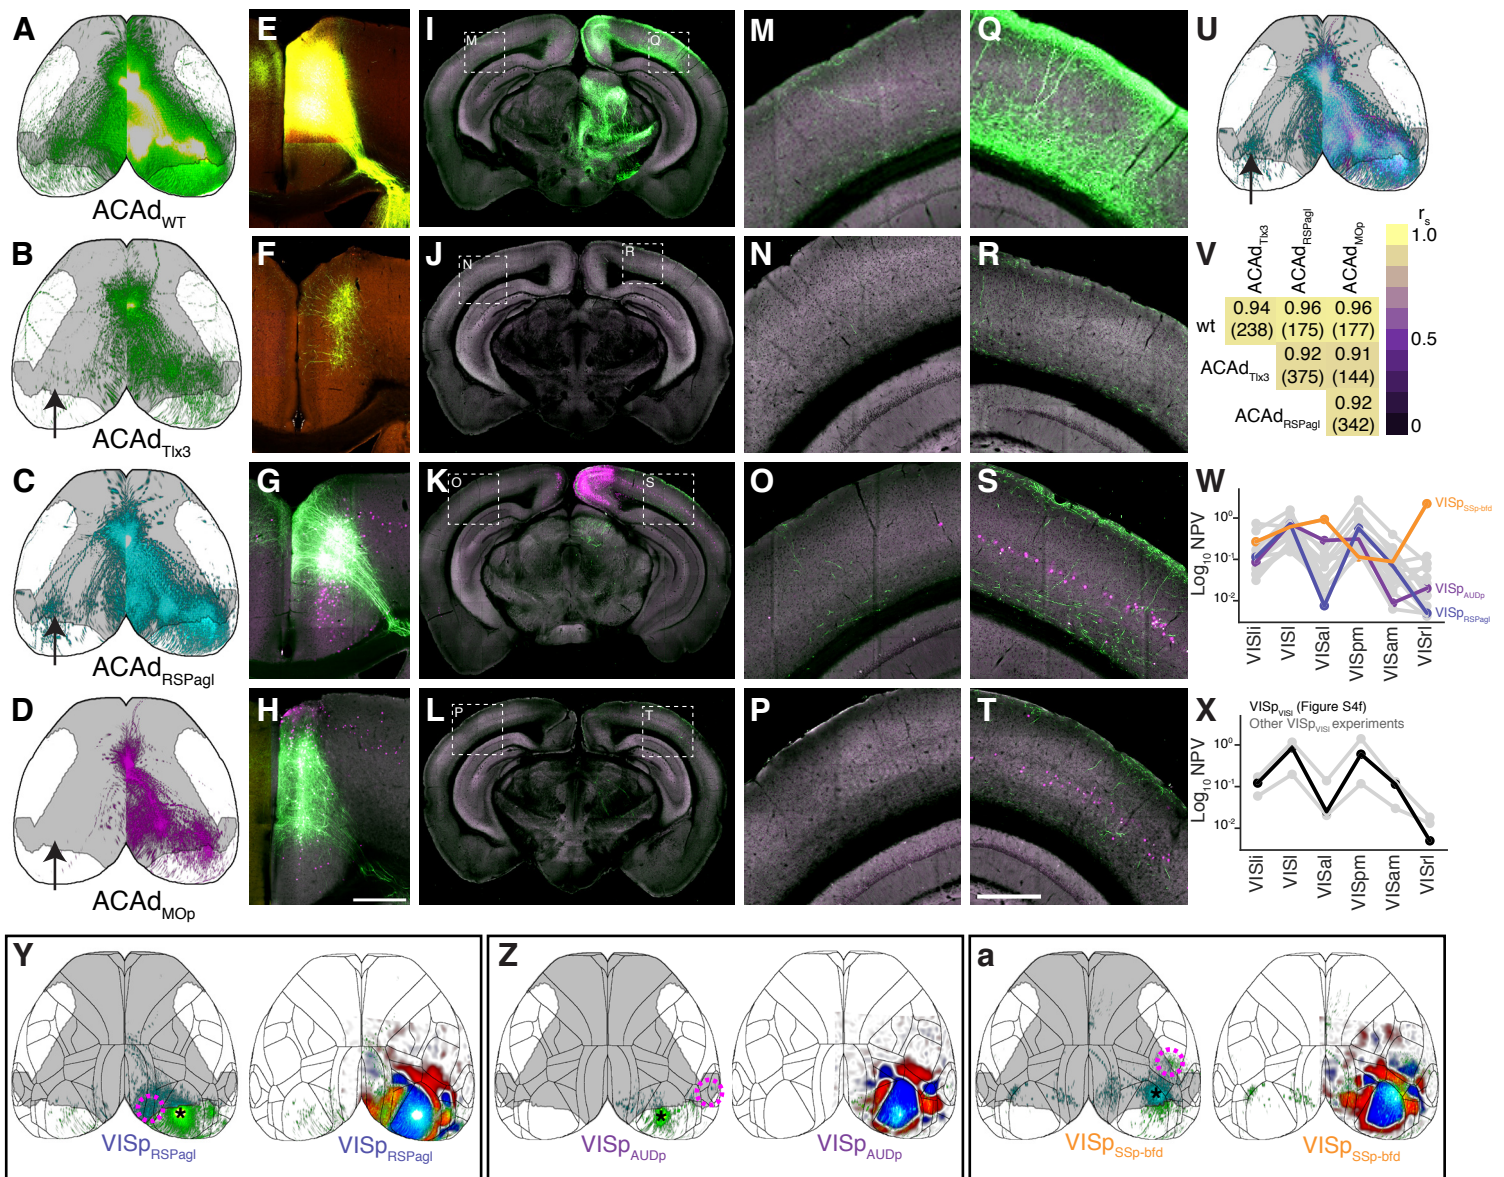

**Figure S6 related to Figures 5 and S5. Additional examples of TD source injections in ACAd and VISp.** (A-D) Cortical projection views for an ACAd injection in a WT mouse (A), a L5-selective Cre driver mouse (Tlx3, B), and two TD experiments (C,D). (E-H) Single section image at the approximate center of each injection site. (I-L) One coronal section from each experiment. Boxed insets show the area enlarged in (M-P, contralateral) and (Q-T, ipsilateral). (U) Overlay of the top down cortical projections from the two TD experiments in C and D. Arrows in B,C,D,U indicate the only notable difference between these experiments: contralateral projections in the ACAd<sub>RSPagl</sub> experiment. (V)  $r_s$  values for the four ACAd experiments shown here. Distance is given in parentheses. Scale = 500  $\mu$ m. Experiment IDs: ACAd<sub>WT</sub> 146593590, ACAd<sub>Tlx3</sub> 293432575, ACAd<sub>RSPagl</sub> 607059419, ACAd<sub>MOp</sub> 475829896. (W) Normalized Projection Volume (NPV) in six visual and medial structures for three VISp<sub>VISI</sub> TD experiments (gray), and for the single VISp<sub>VISI</sub> experiment shown in Figure S4f (black). It is possible that pairing a similar VISp injection with CAV-Cre in a different VISI location would result in a different projection motif given retinotopic organization. (X) NPV in six visual and medial structures for 16 TD injections in VISp (gray). The VISp<sub>RSPagl</sub> projection pattern (blue) resembles the VISp<sub>VISI</sub> pattern in panel a, while the VISp<sub>AUDp</sub> (purple) projections had a different pattern with strong projections in VISli, VISI, VISal, and VISpm and no projections to VISam and VISrl. VISp<sub>SSp-bfd</sub> (orange) projections had yet another pattern, with projections to all the visual areas included here, and strongest in VISrl and VISal. (Y-a) Cortical projection views (left) and sign maps (right) for the VISp<sub>RSPagl</sub> (Y), VISp<sub>AUDp</sub> (Z), and VISp<sub>SSp-bfd</sub> (a) experiments shown in panel w. Asterisk indicates the approximate location of the AAV source injection centroid and dashed circles indicate the approximate area of the CAV2-Cre target injection. Experiment IDs: VISp<sub>RSPagl</sub> 501787135, VISp<sub>AUDp</sub> 501837158, VISp<sub>SSp-bfd</sub> 539323512. The location of the injection centroid for the VISp<sub>SSp-bfd</sub> injection relative to the sign map shows that this source injection was located in a different part of VISp than the VISp<sub>VISI</sub> and VISp<sub>RSPagl</sub> injections, more rostral and lateral. These subtle differences in source location and their correlation to different projection patterns emphasize the importance of careful experiment matching for quantitative comparisons between TD experiments.

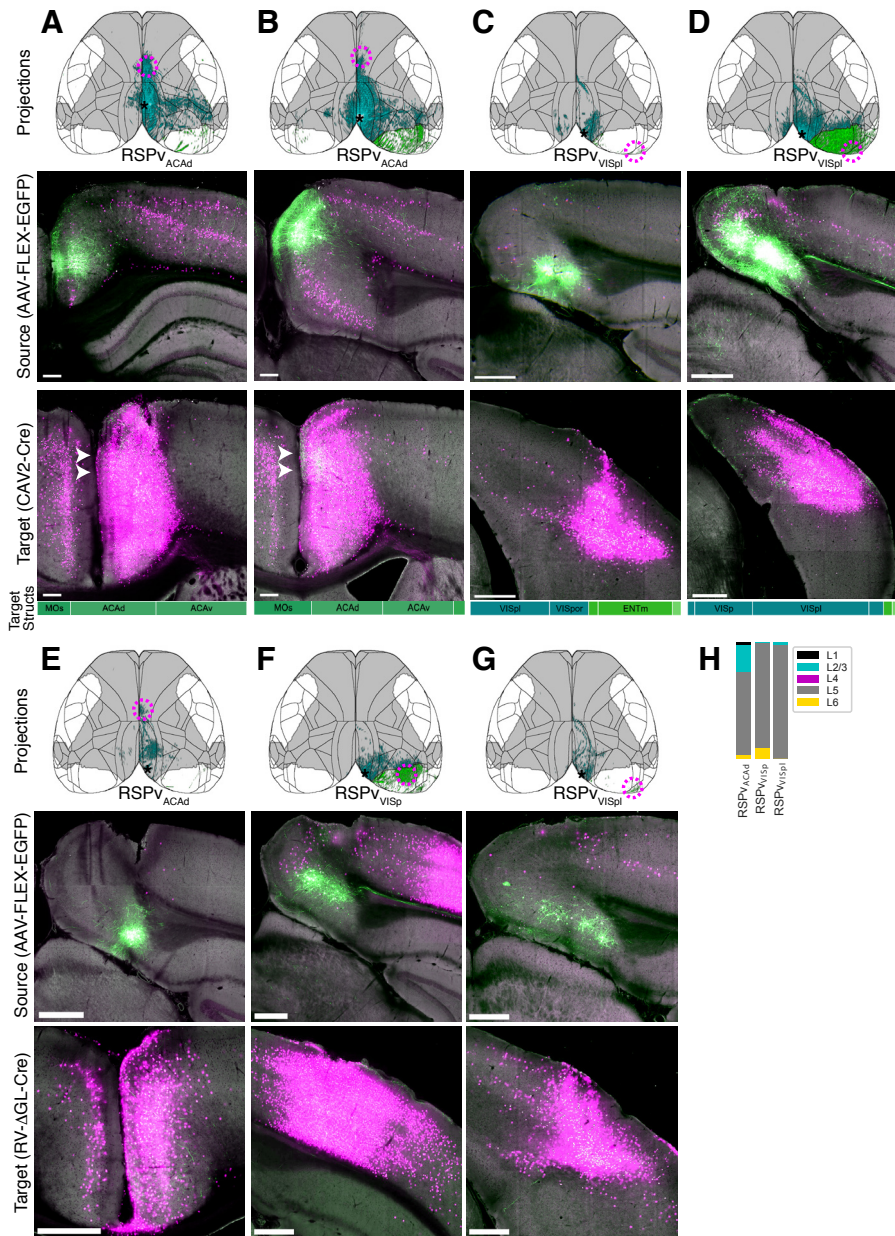

**Figure S7 related to Figure 5. Midline-projecting RSPv cells are only found in caudal, ventral parts of retrosplenial cortex, and can be labeled with either CAV2-Cre or RV-ΔGL-Cre target injections.** (A-D) TD experiments with CAV2-Cre virus target injections. *top*: Cortical projections. Asterisk indicates the approximate centroid of the source injection and magenta circles indicate the approximate location of the target injection. *middle*: Single image section from the approximate center of the source injection site showing the location of EGFP-expressing cell bodies for cells that were infected with both viruses. *bottom*: Single image through the approximate center of the target injection site. Bars on the bottom of the images show the regions in each CAV2-Cre injection site as the fraction of the injection polygon that overlapped with each region. (A) An RSPv<sub>ACAAd</sub> TD injection with a source in the rostral portion of RSPv does not have a midline-projecting pattern. (B) an RSPv<sub>ACAAd</sub> TD injection with a source in the dorsal portion of caudal RSPv does not have a midline-projecting pattern. Arrowheads in a,b point to more dense axons in ACAAd than ACAv. (C) Midline-projecting RSPv cells can be labeled with a target CAV2-Cre injection in VISpl. (D) A different RSPv<sub>VISpl</sub> TD experiment did not label midline-projecting cells. Experiment IDs: RSPv<sub>ACAAd</sub> (A, rostral) 475830603, RSPv<sub>ACAAd</sub> (B, dorsal) 571647261, RSPv<sub>VISpl/ENTm</sub> (C) 592724077, RSPv<sub>VISpl</sub> (D) 666090944. (E-G) TD experiments with RV-ΔGL-Cre target injections. *top*: cortical projections. Asterisk indicates the approximate centroid of the source injection and magenta circles indicate the approximate location of the target injection. *middle*: Single image section from the approximate center of the source injection site showing the location of EGFP-expressing cell bodies for cells that were infected with both viruses. *bottom*: Single image through the approximate center of the target injection site. (E) A RSPv<sub>ACAAd</sub> TD experiment with a midline-projecting pattern. (F) A RSPv<sub>VISp</sub> experiment with a visual-projecting pattern. (G) A RSPv<sub>VISpl</sub> experiment with a midline-projecting pattern. e-g Experimental data available through the AllenSDK. Experiment IDs: RSPv<sub>ACAAd</sub> 605112318, RSPv<sub>VISp</sub> 595890081, RSPv<sub>VISpl</sub> 595261714. (H) Layer composition for each of the three TD source injections with RV-ΔGL-Cre as the target virus determined by registration to CCFv3. Scale = 500 μm.



| <b>Abbreviation</b>           | <b>Full Name</b>                                                                                                    |                        |
|-------------------------------|---------------------------------------------------------------------------------------------------------------------|------------------------|
| AAV-FLEX-EGFP                 | adeno-associated virus containing a flip-excision switch around the EGFP coding sequence driven by the CAG promoter |                        |
| AD                            | Alzheimer's disease                                                                                                 |                        |
| BOLD                          | blood-oxygen-level dependent                                                                                        |                        |
| CAV2-Cre                      | canine adenovirus encoding Cre recombinase                                                                          |                        |
| CCFv3                         | Common Coordinate Framework version 3                                                                               |                        |
| CT                            | corticothalamic (cell type)                                                                                         |                        |
| DEG                           | differentially expressed genes                                                                                      |                        |
| DMN                           | default mode network                                                                                                |                        |
| Emx1                          | Emx1-IRES-Cre mouse line                                                                                            |                        |
| EPI                           | echo planar imaging                                                                                                 |                        |
| FACS                          | fluorescence-activated cell sorting                                                                                 |                        |
| fMRI                          | functional magnetic resonance imaging                                                                               |                        |
| GLM                           | general linear model                                                                                                |                        |
| ICA                           | independent component analysis                                                                                      |                        |
| ISH                           | In situ hybridization                                                                                               |                        |
| IT                            | intratelencephalic (cell type)                                                                                      |                        |
| IQR                           | Interquartile range                                                                                                 |                        |
| L[#]                          | cortical layer (e.g. L1, L2/3, L4, L5, L6)                                                                          |                        |
| MCA                           | (Allen) Mouse Brain Connectivity Atlas                                                                              |                        |
| module                        | group of brain regions identified using a community detection algorithm                                             |                        |
| network                       | group of interconnected neurons or brain regions                                                                    |                        |
| nls-tdT                       | nuclear-localized td (tandem-dimer) Tomato fluorescent protein                                                      |                        |
| PT                            | pyramidal tract (cell type)                                                                                         |                        |
| r                             | Pearson correlation                                                                                                 |                        |
| r <sub>s</sub>                | Spearman correlation                                                                                                |                        |
| Rbp4                          | Rbp4-Cre_KL100 mouse line                                                                                           |                        |
| ROI                           | region of interest                                                                                                  |                        |
| rs                            | resting state                                                                                                       |                        |
| RSS                           | residual sum of squares                                                                                             |                        |
| scRNA-seq                     | single cell RNA sequencing                                                                                          |                        |
| SSv4                          | SMART-Seq v4                                                                                                        |                        |
| STPT                          | serial two photon tomography                                                                                        |                        |
| TD                            | target-defined                                                                                                      |                        |
| WT                            | wild type mice                                                                                                      |                        |
| <b>Brain Regions</b>          |                                                                                                                     |                        |
| <b>Structure Abbreviation</b> | <b>Structure Name</b>                                                                                               | <b>Cortical Module</b> |
| <b>Isocortex</b>              | Isocortex                                                                                                           |                        |
| ACA <sub>d</sub>              | Anterior cingulate area, dorsal part                                                                                | Prefrontal             |
| ACA <sub>v</sub>              | Anterior cingulate area, ventral part                                                                               | Prefrontal             |
| PL                            | Prelimbic area                                                                                                      | Prefrontal             |

|              |                                            |             |
|--------------|--------------------------------------------|-------------|
| ILA          | Infralimbic area                           | Prefrontal  |
| ORBI         | Orbital area, lateral part                 | Prefrontal  |
| ORBm         | Orbital area, medial part                  | Prefrontal  |
| ORBvl        | Orbital area, ventrolateral part           | Prefrontal  |
| VISa         | Anterior area                              | Medial      |
| VISam        | Anteromedial visual area                   | Medial      |
| RSPagl       | Retrosplenial area, lateral agranular part | Medial      |
| RSPd         | Retrosplenial area, dorsal part            | Medial      |
| RSPv         | Retrosplenial area, ventral part           | Medial      |
| SSp-tr       | Primary somatosensory area, trunk          | Somatomotor |
| SSp-ll       | Primary somatosensory area, lower limb     | Somatomotor |
| MOs          | Secondary motor area                       | Somatomotor |
| SSs          | Supplemental somatosensory area            | Somatomotor |
| SSp-bfd      | Primary somatosensory area, barrel field   | Somatomotor |
| SSp-ul       | Primary somatosensory area, upper limb     | Somatomotor |
| SSp-un       | Primary somatosensory area, unassigned     | Somatomotor |
| SSp-n        | Primary somatosensory area, nose           | Somatomotor |
| SSp-m        | Primary somatosensory area, mouth          | Somatomotor |
| MOp          | Primary motor area                         | Somatomotor |
| FRP          | Frontal pole, cerebral cortex              | Prefrontal  |
| VISpm        | posteromedial visual area                  | Medial      |
| Ald          | Agranular insular area, dorsal part        | Lateral     |
| Alv          | Agranular insular area, ventral part       | Lateral     |
| Alp          | Agranular insular area, posterior part     | Lateral     |
| GU           | Gustatory areas                            | Lateral     |
| VISC         | Visceral area                              | Lateral     |
| TEa          | Temporal association areas                 | Lateral     |
| PERI         | Perirhinal cortex                          | Lateral     |
| ECT          | Ectorhinal area                            | Lateral     |
| VISal        | Anterolateral visual area                  | Visual      |
| VISI         | Lateral visual area                        | Visual      |
| VISp         | Primary visual area                        | Visual      |
| VISpl        | Posterolateral visual area                 | Visual      |
| VISli        | Laterointermediate area                    | Visual      |
| VISpor       | Postrhinal area                            | Visual      |
| VISrl        | Rostrolateral visual area                  | Visual      |
| AUDd         | Dorsal auditory area                       | Auditory    |
| AUDp         | Primary auditory area                      | Auditory    |
| AUDpo        | Posterior auditory area                    | Auditory    |
| AUDv         | Ventral auditory area                      | Auditory    |
| <b>HPF</b>   | <b>Hippocampal Formation</b>               |             |
| CA1          | Field CA1                                  |             |
| CA2          | Field CA2                                  |             |
| CA3          | Field CA3                                  |             |
| DG           | Dentate gyrus                              |             |
| ENTI         | Entorhinal area, lateral part              |             |
| ENTm         | Entorhinal area, medial part               |             |
| <b>CTXsp</b> | <b>Cortical Subplate</b>                   |             |
| CLA          | Clastrum                                   |             |
| <b>OLF</b>   | <b>Olfactory Areas</b>                     |             |
| AOB          | Accessory olfactory bulb                   |             |
| AON          | Anterior olfactory nucleus                 |             |
| TT           | Taenia tecta                               |             |

|            |                                                   |  |
|------------|---------------------------------------------------|--|
| DP         | Dorsal peduncular area                            |  |
| <b>STR</b> | <b>Striatum</b>                                   |  |
| CP         | Caudoputamen                                      |  |
| ACB        | Nucleus accumbens                                 |  |
| LSc        | Lateral septal nucleus, caudal (caudodorsal) part |  |
| <b>TH</b>  | <b>Thalamus</b>                                   |  |
| LP         | Lateral posterior nucleus of the thalamus         |  |
| PO         | Posterior complex of the thalamus                 |  |
| IAM        | Interanteromedial nucleus of the thalamus         |  |
| IAD        | Interanterodorsal nucleus of the thalamus         |  |
| IMD        | Intermediodorsal nucleus of the thalamus          |  |
| MD         | Mediodorsal nucleus of the thalamus               |  |
| RH         | Rhomboid nucleus                                  |  |
| CM         | Central medial nucleus of the thalamus            |  |
| PCN        | Paracentral nucleus                               |  |
| CL         | Central lateral nucleus of the thalamus           |  |
| PF         | Parafascicular nucleus                            |  |
| <b>MB</b>  | <b>Midbrain</b>                                   |  |
| SCs        | Superior Colliculus, sensory-related              |  |
| <b>PAL</b> | <b>Pallidum</b>                                   |  |
|            |                                                   |  |

**Table S1 related to Figure 1 and all text. Abbreviations.**

|                    | Structure | % of Structure in core-DMN Mask (z>1.7) | % of Structure in DMN Mask (z>1) | Fraction of projections in DMN (mean) | Fraction of projections in DMN (SD) | DMN Coefficient (mean) | DMN Coefficient (SD) | Number of Experiments |
|--------------------|-----------|-----------------------------------------|----------------------------------|---------------------------------------|-------------------------------------|------------------------|----------------------|-----------------------|
| in-DMN Structures  | ACAv      | 100                                     | 100                              | 0.93                                  | 0.03                                | 0.22                   | 0.1                  | 5                     |
|                    | ACAd      | 99                                      | 99                               | 0.9                                   | 0.04                                | 0.2                    | 0.1                  | 11                    |
|                    | SSp-tr    | 98                                      | 99                               | 0.81                                  | 0.02                                | 0.06                   | 0.05                 | 2                     |
|                    | ILA       | 97                                      | 99                               | 0.89                                  | 0.05                                | 0.11                   | 0                    | 2                     |
|                    | SSp-ll    | 97                                      | 98                               | 0.72                                  | 0.06                                | 0.01                   | 0.04                 | 6                     |
|                    | PL        | 89                                      | 89                               | 0.81                                  | 0.04                                | 0.12                   | 0.09                 | 3                     |
|                    | ORBvl     | 89                                      | 93                               | 0.79                                  | 0.03                                | 0.25                   | 0.1                  | 5                     |
|                    | VISa      | 87                                      | 96                               | 0.77                                  | 0.03                                | 0.08                   | 0.02                 | 2                     |
|                    | ORBm      | 84                                      | 88                               | 0.78                                  | 0.03                                | 0.19                   | 0.06                 | 3                     |
|                    | ORBl      | 77                                      | 93                               | 0.67                                  | 0.12                                | 0.05                   | 0.15                 | 5                     |
|                    | VISam     | 72                                      | 85                               | 0.66                                  | 0.06                                | 0.04                   | 0.03                 | 8                     |
|                    | RSPd      | 64                                      | 70                               | 0.45                                  | 0.3                                 | -0.04                  | 0.03                 | 6                     |
|                    | RSPv      | 67                                      | 78                               | 0.69                                  | 0.19                                | 0                      | 0.04                 | 11                    |
|                    | MOs       | 52                                      | 64                               | 0.46                                  | 0.29                                | -0.19                  | 0.29                 | 18                    |
|                    | RSPagl    | 51                                      | 62                               | 0.6                                   | 0.22                                | 0.02                   | 0.05                 | 8                     |
| borderline         | VISrl     | 42                                      | 62                               | 0.64                                  | 0.04                                | 0.09                   | 0.02                 | 6                     |
|                    | VISpm     | 32                                      | 63                               | 0.51                                  | 0.09                                | -0.01                  | 0.04                 | 8                     |
|                    | Ald       | 10                                      | 61                               | 0.4                                   | 0.15                                | -0.11                  | 0.09                 | 3                     |
|                    | Alv       | 5                                       | 53                               | 0.56                                  | 0                                   | 0.03                   | 0                    | 1                     |
| out-DMN Structures | SSp-ul    | 30                                      | 39                               | 0.56                                  | 0.29                                | -0.07                  | 0.07                 | 5                     |
|                    | MOp       | 28                                      | 40                               | 0.43                                  | 0.27                                | -0.19                  | 0.23                 | 9                     |
|                    | SSp-un    | 24                                      | 32                               | 0.48                                  | 0                                   | -0.01                  | 0                    | 1                     |
|                    | FRP       | 20                                      | 30                               | 0.37                                  | 0                                   | -0.17                  | 0                    | 1                     |
|                    | SSp-bfd   | 16                                      | 27                               | 0.5                                   | 0.18                                | 0                      | 0.05                 | 13                    |
|                    | VISp      | 6                                       | 12                               | 0.23                                  | 0.17                                | -0.04                  | 0.04                 | 80                    |
|                    | SSs       | 0                                       | 0                                | 0.13                                  | 0.09                                | -0.24                  | 0.14                 | 7                     |
|                    | SSp-n     | 0                                       | 0                                | 0.09                                  | 0.03                                | -0.23                  | 0.07                 | 5                     |
|                    | SSp-m     | 0                                       | 0                                | 0.07                                  | 0.05                                | -0.27                  | 0.15                 | 7                     |
|                    | Aip       | 0                                       | 0                                | 0.16                                  | 0                                   | -0.09                  | 0                    | 1                     |
|                    | GU        | 0                                       | 1                                | 0.08                                  | 0.08                                | -0.09                  | 0.11                 | 2                     |
|                    | VISC      | 0                                       | 0                                | 0.19                                  | 0.07                                | -0.26                  | 0.12                 | 4                     |
|                    | Tea       | 0                                       | 1                                | N/A                                   | N/A                                 | N/A                    | N/A                  | 0                     |
|                    | PERI      | 0                                       | 0                                | N/A                                   | N/A                                 | N/A                    | N/A                  | 0                     |
|                    | ECT       | 0                                       | 0                                | 0.16                                  | 0.15                                | -0.04                  | 0                    | 2                     |
|                    | VISal     | 0                                       | 23                               | 0.38                                  | 0.04                                | 0                      | 0.01                 | 5                     |
|                    | VISl      | 0                                       | 0                                | 0.21                                  | 0.06                                | -0.05                  | 0.03                 | 12                    |
|                    | VISpl     | 0                                       | 1                                | 0.06                                  | 0.02                                | -0.06                  | 0.07                 | 3                     |
|                    | VISli     | 0                                       | 3                                | 0.17                                  | 0.05                                | -0.08                  | 0.02                 | 2                     |
|                    | VISpor    | 0                                       | 0                                | 0.12                                  | 0.04                                | -0.09                  | 0.02                 | 11                    |
| AUDd               | 0         | 21                                      | 0.34                             | 0.03                                  | -0.04                               | 0.04                   | 2                    |                       |
| AUDp               | 0         | 12                                      | 0.23                             | 0.08                                  | -0.06                               | 0.02                   | 7                    |                       |
| AUDpo              | 0         | 26                                      | 0.28                             | 0.13                                  | -0.03                               | 0.02                   | 7                    |                       |
| AUDv               | 0         | 0                                       | 0.12                             | 0                                     | -0.1                                | 0                      | 1                    |                       |

**Table S3 related to Figure 1.** Cortical structures designated as in-DMN, out-DMN, and borderline for DMN membership (assigned to out-DMN). The fraction of each structure in the DMN and core masks, mean and standard deviation (SD) for the fraction of projections in the DMN for WT injection experiments in each structure, mean and SD for the DMN coefficient for WT injection experiments in each structure, and number of WT injections per structure are provided. Abbreviations in **Table S1**.
